# Supplementary material
Source: PubMed Central journal article supplement (PMC8105015)
Supplement: AEM.02441-20-s0001.pdf [file AEM.02441-20-s0001.pdf]

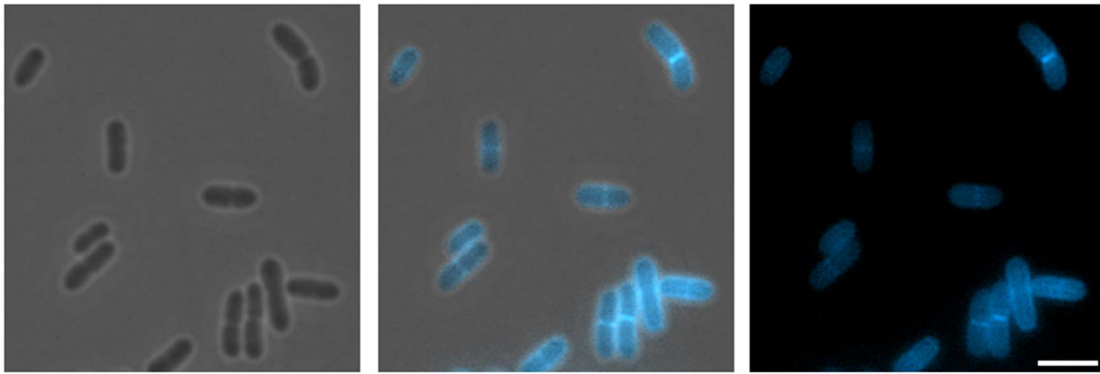

1

2 Figure S1. Growing sites of Zm6 cells visualized by a HADA-labeling. Zm6 cells  
3 growing under anaerobic conditions were stained with HADA at 500  $\mu\text{M}$  for 30  
4 minutes under a dark condition. The cells were then washed with PBS twice and  
5 mounted on PBS agarose pad and imaged by a fluorescence microscope. The  
6 labeling showed that *Z. mobilis* cell incorporated new cell wall materials at its division  
7 site and lateral walls. Left panel; a phase contrast image. Middle; an overlay of phase  
8 contrast and fluorescence images. Right; a fluorescence image. Blue; HADA. Scale  
9 bar; 4  $\mu\text{m}$ .

10

11

12

13

14

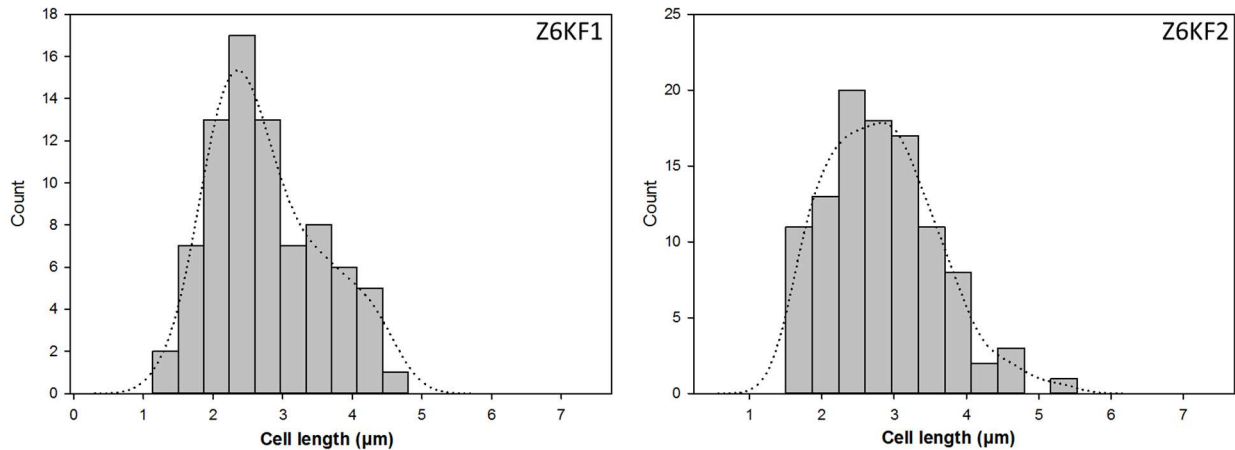

15

16 Figure S2. Histogram and Kernel density plot of cell length in growing *Z. mobilis*  
 17 strains Z6KF1 and Z6KF2. Growing Z6KF1 (OD<sub>600</sub> 0.8) and Z6KF2 (OD<sub>600</sub> 0.32)  
 18 culture was directly mounted on PBS agarose pad and imaged by phase contrast  
 19 microscopy. The mean of cell length was 2.78  $\mu\text{m}$  for Z6KF1 ( $n = 79$ ) and 2.83  $\mu\text{m}$  for  
 20 Z6KF2 ( $n = 104$ ). The bandwidth used for the Kernel density plot was 0.299 for  
 21 Z6KF1 and 0.272 for Z6KF2. To test the functionality of FtsZ-GFP fusion protein, we  
 22 first examined if the expression altered morphology or cell size in the strain Z6KF2.  
 23 Despite that overexpression of *ftsZ* is known to cause reduction of cell size in several  
 24 bacteria, the cells did not show any obvious morphological changes. The result  
 25 suggested two possibilities; an overexpression of functional FtsZ-GFP did not alter  
 26 cell function in the strain, or that the fusion protein was not functional and did not  
 27 cause any dominant negative effects. The strain Z6KF1 carrying intact *ftsZ* in the  
 28 pBBR plasmid, exhibited no obvious morphological defects either, indicating that  
 29 overproduction of functional FtsZ by the pBBR1 plasmid was not overwhelming the  
 30 native production of Zm6 FtsZ. Note that same upstream promoter was used for  
 31 expressions of *ftsZ* in Z6KF1 and *ftsZ-GFP* in Z6KF2. These phenotypic  
 32 observations, together with subcellular localization of the *Z. mobilis* FtsZ-GFP fusion

33 in the strain Z6KF2, indicated that FtsZ-GFP did not cause much disturbance to the  
34 cellular organization in the expressed strain.

35

36

37

38

39

40

41

42

43

44

45

46

47

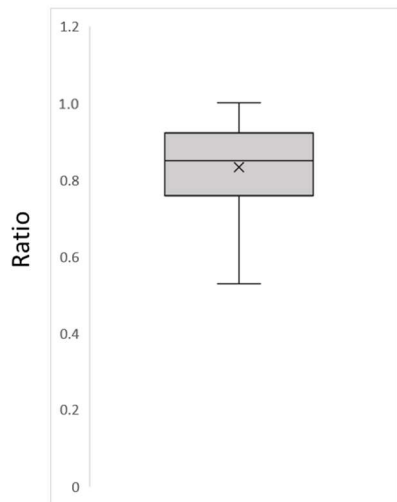

48

49 Figure S3. Box and whisker plot of ratio of short:long cell compartment length in  
50 growing *Z. mobilis* strains Z6KF2. Cell compartment length was defined as distance  
51 between a cell pole to Z-ring position. The box shows the ratio of short:long cell-  
52 compartments. The box is marked with mean (x) and median (middle line of the box).  
53 Note that the mean value of the cell compartment ratio (0.833) is very close to the  
54 ratio of dividing daughter cells (0.837) in the Figure 1, showing that Z-ring positions  
55 represent division sites in *Z. mobilis* cells.  $n = 106$ .

56

57

58

59

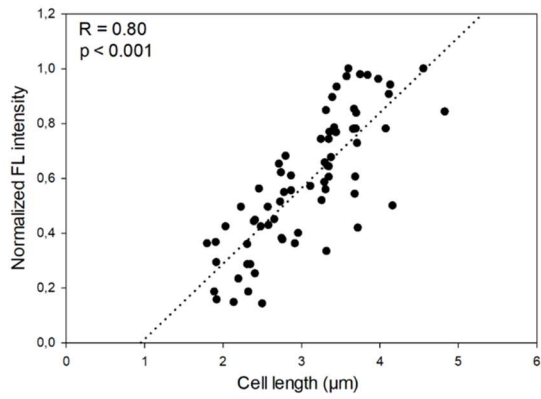

60

61 Figure S4. Plot of normalized FtsZ-GFP peak intensity within a cell by a function of its  
62 cell length. The linear relationship indicates that cells accumulated FtsZ ring linearly  
63 along with cell growth. Pearson's  $r = 0.8$ ,  $p$ -value  $< 0.001$ .  $n = 80$ .

64

65

66

67

68

69

70

71

72

73

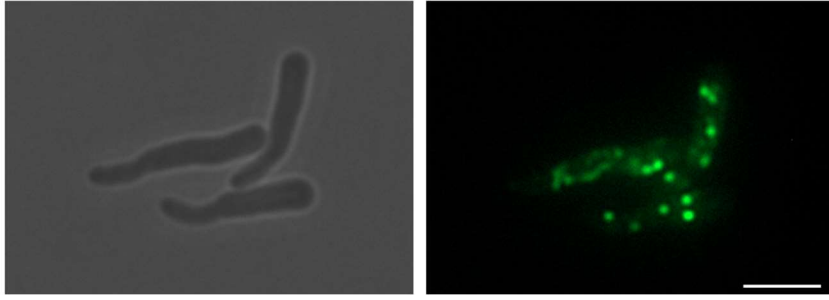

74

75 Figure S5. FtsZ-GFP sub-cellular localizations in salt stress-induced filamentous  
76 Z6KF2 cells. The Z6KF2 culture was grown in the complex medium supplemented  
77 with 0.2 M NaCl. The growing filamented cells were directly mounted on agarose pad  
78 of the identical growth medium, and fluorescence imaging was performed. FtsZ-GFP  
79 formed either foci or filamentous structured in the elongated cells. Left; phase  
80 contrast image. Right; fluorescence image. Green; FtsZ-GFP. Scale bar; 5  $\mu$ m.

81

82

83

84

85

86

87

88

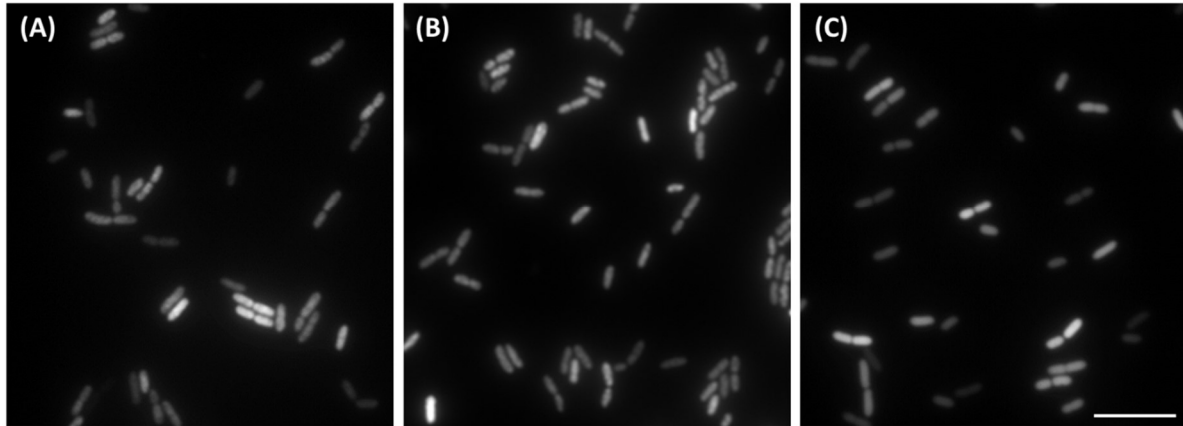

89

90 Figure S6. Visualizing *Z. mobilis* nucleoids by different staining methods. The staining  
91 was to examine if variant FL signal intensities found in Zm6 cells (Fig. 5A, 5C) were  
92 due to possible artifacts from the staining procedure. (A) Growing Zm6 cells stained  
93 with DAPI 50  $\mu\text{g/ml}$  for 20 minutes. (B) Growing Zm6 cells stained with SYTO 9 at 11  
94  $\mu\text{M}$  for 10 minutes. (C) SYTO 9 staining of chemically fixed Zm6 cell. The cells were  
95 fixed by 10% formalin (v/v) for half hour, washed with PBS and stained with SYTO 9  
96 at 0.5  $\mu\text{M}$ . The cells were washed with PBS in all tested methods before imaging. All  
97 three staining procedures resulted in the variant FL signal intensities between Zm6  
98 cells. The result of (A) ruled out a possibility of dye-specific artefact as a cause of the  
99 variant FL signals among individual Zm6 cells. The result of (B) excluded a possibility  
100 of artefact caused by a depletion of dye in (Fig. 5A). The result of (C) excluded a  
101 possibility of stress-response based phenomenon to cause the variant FL intensities  
102 in (Fig. 5A). White; fluorescence signals from the dyes. Scale bar; 10  $\mu\text{m}$ .

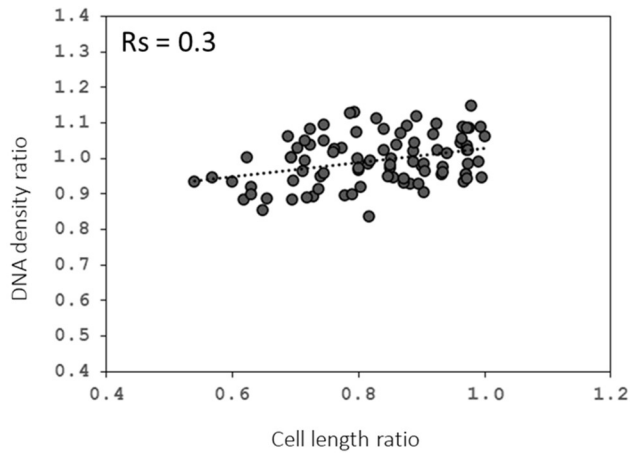

103

104 Figure S7. Plot of cell DNA crowdedness ratio by a function of ratio of cell length  
105 between paired-sibling cells (short:long cell length). DNA crowdedness/density was  
106 an average of FL signal intensities within cell. Spearman's rank correlation test;  $R_s =$   
107 0.3,  $p\text{-value} > 0.001$ ,  $n = 90$ .

108

109

110

111

112



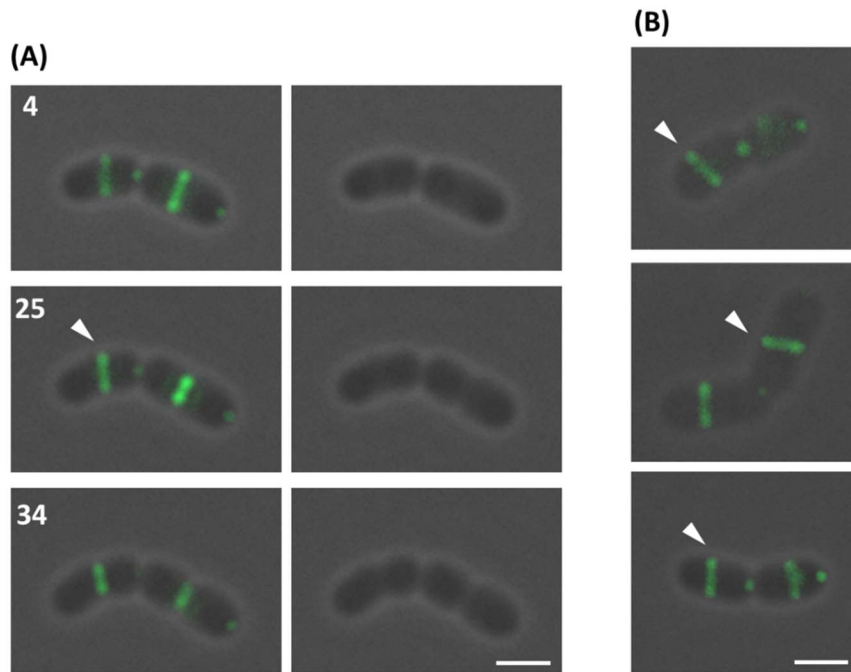

113

114 Figure S8. Inclined Z-rings in Z6KF2 cells. (A) Short time-lapse imaging of Z6KF2  
 115 cells anaerobically growing on the complex medium agarose pad. Left panels,  
 116 overlays of phase contrast and fluorescence images (green: FtsZ-GFP). Right  
 117 panels, phase contrast images. Numbers indicate minutes after imaging started. (B)  
 118 Single time imaging of growing Z6KF2 cells. Images are overlays of phase contrast  
 119 and fluorescence images. Note that Z-rings were leaned from the short axis in some  
 120 of growing Z6KF2 cells. White arrowheads indicate inclined Z-ring in all images.  
 121 Scale bars; 2  $\mu\text{m}$  for all images.

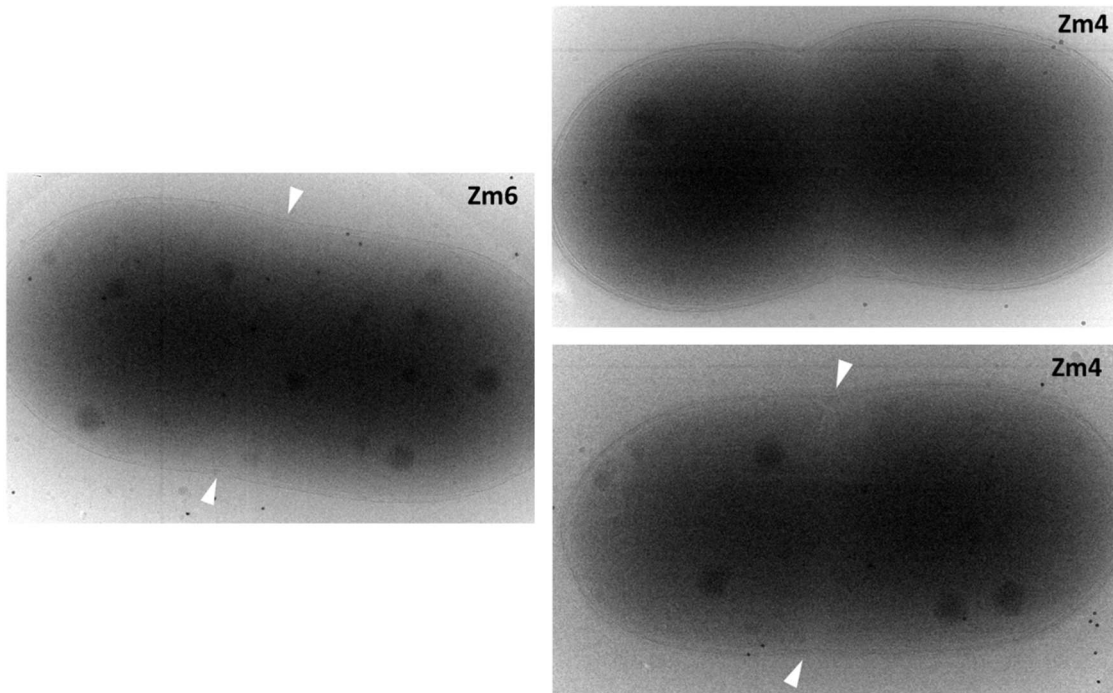

122

123 Figure S9. Electron micrographs of the strain Zm6 cell (left) and the strain Zm4 cells  
124 (right). Arrowheads indicate constriction sites that are slightly inclined from short  
125 vertical axis of cells.
